# Supplementary material for: Effects of Spermidine on Gut Microbiota Modulation in Experimental Abdominal Aortic Aneurysm Mice
Source: MDPI journal article supplement (doi:10.3390/nu14163349), 2022-08-16
Supplement: s1 [file s1]

Table S3 KEGG Orthology-Based Annotation of the significantly altered KOs

| KEGG_Entry | Entry_Desc                                                                                                                                   |
|------------|----------------------------------------------------------------------------------------------------------------------------------------------|
| K00,076    | 7-alpha-hydroxysteroid dehydrogenase [EC:1.1.1.159]                                                                                          |
| K00,124    | formate dehydrogenase, beta subunit [EC:1.2.1.2]                                                                                             |
| K00,246    | fumarate reductase subunit C; fumarate reductase subunit C [EC:1.3.99.1]<br>cytochrome c oxidase cb-type subunit IV;                         |
| K00,407    | cb-type cytochrome c oxidase subunit IV [EC:1.9.3.1]                                                                                         |
| K00,411    | ubiquinol-cytochrome c reductase iron-sulfur subunit [EC:1.10.2.2]<br>ubiquinol-cytochrome c reductase cytochrome b subunit;                 |
| K00,412    | ubiquinol-cytochrome c reductase cytochrome b subunit [EC:1.10.2.2]<br>ubiquinol-cytochrome c reductase cytochrome c1 subunit [EC:1.10.2.2]; |
| K00,413    | ubiquinol-cytochrome c reductase cytochrome c1 subunit                                                                                       |
| K00,429    | catalase [EC:1.11.1.6]                                                                                                                       |
| K00,557    | tRNA (uracil-5-)-methyltransferase [EC:2.1.1.35]                                                                                             |
| K00,619    | amino-acid N-acetyltransferase [EC:2.3.1.1]                                                                                                  |
| K01,121    | 2',3'-cyclic-nucleotide 3'-phosphodiesterase [EC:3.1.4.37]                                                                                   |
| K01,139    | guanosine-3',5'-bis(diphosphate) 3'-pyrophosphohydrolase [EC:3.1.7.2]                                                                        |
| K01,497    | GTP cyclohydrolase II [EC:3.5.4.25]                                                                                                          |
| K01,514    | exopolyphosphatase [EC:3.6.1.11]                                                                                                             |
| K01,659    | 2-methylcitrate synthase [EC:2.3.3.5]                                                                                                        |
| K01,664    | para-aminobenzoate synthetase component II [EC:2.6.1.85]                                                                                     |
| K01,674    | carbonic anhydrase [EC:4.2.1.1]                                                                                                              |
| K01,682    | aconitate hydratase 2 [EC:4.2.1.3]                                                                                                           |
| K01,718    | pseudouridylate synthase [EC:4.2.1.70]                                                                                                       |
| K01,720    | 2-methylcitrate dehydratase [EC:4.2.1.79]                                                                                                    |
| K01,908    | propionyl-CoA synthetase [EC:6.2.1.17]                                                                                                       |
| K01,916    | NAD <sup>+</sup> synthase [EC:6.3.1.5]                                                                                                       |
| K01,917    | glutathionylspermidine synthase [EC:6.3.1.8]                                                                                                 |

|         |                                                                                               |
|---------|-----------------------------------------------------------------------------------------------|
| K01,959 | pyruvate carboxylase subunit A [EC:6.4.1.1]                                                   |
| K02,075 | zinc/manganese transport system permease protein                                              |
| K02,195 | heme exporter protein C                                                                       |
| K02,242 | competence protein ComFC                                                                      |
| K02,386 | flagella basal body P-ring formation protein FlgA                                             |
| K02,393 | flagellar L-ring protein precursor FlgH                                                       |
| K02,404 | flagellar biosynthesis protein FlhF                                                           |
| K02,439 | thiosulfate sulfurtransferase [EC:2.8.1.1]                                                    |
| K02,568 | cytochrome c-type protein NapB                                                                |
| K02,570 | periplasmic nitrate reductase NapD                                                            |
| K02,574 | ferredoxin-type protein NapH                                                                  |
| K02,858 | 3,4-dihydroxy 2-butanone 4-phosphate synthase [EC:4.1.99.12]                                  |
| K03,191 | acid-activated urea channel                                                                   |
| K03,304 | tellurite resistance/dicarboxylate transporter, TDT family<br>para-aminobenzoate synthetase / |
| K03,342 | 4-amino-4-deoxychorismate lyase [EC:2.6.1.85 4.1.3.38]                                        |
| K03,415 | two-component system, chemotaxis family, response regulator CheV                              |
| K03,417 | methylisocitrate lyase [EC:4.1.3.30]                                                          |
| K03,532 | trimethylamine-N-oxide reductase(cytochrome c) 1, cytochrome c-type subunit TorC              |
| K03,605 | hydrogenase 1 maturation protease [EC:3.4.24.-]                                               |
| K03,634 | outer membrane lipoprotein carrier protein                                                    |
| K03,694 | ATP-dependent Clp protease ATP-binding subunit ClpA                                           |
| K03,749 | DedD protein                                                                                  |
| K03,833 | selenocysteine-specific elongation factor                                                     |
| K03,837 | serine transporter                                                                            |
| K03,893 | arsenical pump membrane protein                                                               |
| K03,923 | modulator of drug activity B                                                                  |
| K03,981 | thiol:disulfide interchange protein DsbC [EC:5.3.4.1]                                         |

|         |                                                                               |
|---------|-------------------------------------------------------------------------------|
| K04,744 | LPS-assembly protein                                                          |
| K05,835 | threonine efflux protein                                                      |
| K05,922 | quinone-reactive Ni/Fe-hydrogenase large subunit [EC:1.12.5.1]                |
| K05,927 | quinone-reactive Ni/Fe-hydrogenase small subunit [EC:1.12.5.1]                |
|         | tRNA pseudouridine13 synthase [EC:5.4.99.27];                                 |
| K06,176 | tRNA pseudouridine synthase D [EC:5.4.99.12]                                  |
| K06,603 | flagellar protein FlaG                                                        |
| K07,226 | hypothetical protein                                                          |
| K07,270 | glycosyl transferase, family 25                                               |
| K07,288 | uncharacterized membrane protein                                              |
| K07,318 | adenine-specific DNA-methyltransferase [EC:2.1.1.72]                          |
| K07,337 | hypothetical protein                                                          |
| K07,457 | endonuclease III related protein                                              |
| K07,501 | hypothetical protein                                                          |
| K07,710 | two-component system, NtrC family, sensor histidine kinase AtoS [EC:2.7.13.3] |
| K08,077 | UDP-sugar diphosphatase [EC:3.6.1.45]                                         |
| K08,306 | membrane-bound lytic murein transglycosylase C [EC:3.2.1.-]                   |
| K08,350 | formate dehydrogenase-N, gamma subunit [EC:1.2.1.2]                           |
| K08,973 | putative membrane protein                                                     |
| K09,516 | all-trans-retinol 13,14-reductase [EC:1.3.99.23]                              |
| K09,726 | hypothetical protein                                                          |
| K09,794 | hypothetical protein                                                          |
| K09,795 | hypothetical protein                                                          |
| K09,798 | hypothetical protein                                                          |
| K09,804 | hypothetical protein                                                          |
| K09,859 | hypothetical protein                                                          |
| K09,860 | hypothetical protein                                                          |
| K09,943 | hypothetical protein                                                          |

|         |                                                                      |
|---------|----------------------------------------------------------------------|
| K09,944 | hypothetical protein                                                 |
| K09,952 | hypothetical protein                                                 |
| K10,040 | putative glutamine transport system permease protein                 |
| K10,041 | putative glutamine transport system ATP-binding protein [EC:3.6.3.-] |
| K11,013 | cytolethal distending toxin subunit A                                |
| K11,014 | cytolethal distending toxin subunit B                                |
| K11,015 | cytolethal distending toxin subunit C                                |
| K11,688 | C4-dicarboxylate-binding protein DctP                                |
| K11,742 | spermidine export protein MdtI                                       |
| K11,891 | type VI secretion system protein ImpL                                |
| K11,892 | type VI secretion system protein ImpK                                |
| K11,893 | type VI secretion system protein ImpJ                                |
| K11,895 | type VI secretion system protein ImpH                                |
| K11,896 | type VI secretion system protein ImpG                                |
| K11,900 | type VI secretion system protein ImpC                                |
| K11,901 | type VI secretion system protein ImpB                                |
| K11,903 | type VI secretion system secreted protein Hcp                        |
| K11,905 | type VI secretion system protein                                     |
| K11,906 | type VI secretion system protein VasD                                |
| K13,640 | MerR family transcriptional regulator, heat shock protein HspR       |
| K13,797 | DNA-directed RNA polymerase subunit beta-beta' [EC:2.7.7.6]          |
| K13,819 | NifU-like protein                                                    |
| K13,893 | microcin C transport system substrate-binding protein                |
| K13,894 | microcin C transport system permease protein                         |
| K13,895 | microcin C transport system permease protein                         |
| K13,896 | microcin C transport system ATP-binding protein                      |
| K14,048 | urease subunit gamma/beta [EC:3.5.1.5]                               |
| K14,261 | alanine-synthesizing transaminase [EC:2.6.1.-]                       |

---
