# Supplementary material for: Effects of Spermidine on Gut Microbiota Modulation in Experimental Abdominal Aortic Aneurysm Mice
Source: MDPI journal article supplement (doi:10.3390/nu14163349), 2022-08-16
Supplement: s1 [file s1]

Table S1 Enzyme annotation in polyamine metabolism using the KEGG Orthology

| KEGG_Entry | Entry_Desc                                                                    |
|------------|-------------------------------------------------------------------------------|
| K00,797    | speE;spermidine synthase [EC:2.5.1.16]                                        |
| K01,480    | speB;agmatinase [EC:3.5.3.11]                                                 |
| K01,583    | E4.1.1.19;arginine decarboxylase [EC:4.1.1.19]                                |
| K01,585    | speA;arginine decarboxylase [EC:4.1.1.19]                                     |
| K01,611    | speD;S-adenosylmethionine decarboxylase [EC:4.1.1.50]                         |
|            | ABC.SP.A;putative spermidine/putrescine transport system ATP-binding          |
| K02,052    | protein                                                                       |
| K02,053    | ABC.SP.P;putative spermidine/putrescine transport system permease protein     |
| K02,054    | ABC.SP.P1;putative spermidine/putrescine transport system permease protein    |
| K11,069    | potD;spermidine/putrescine transport system substrate-binding protein         |
| K11,070    | potC;spermidine/putrescine transport system permease protein                  |
| K11,071    | potB;spermidine/putrescine transport system permease protein                  |
| K11,072    | potA;spermidine/putrescine transport system ATP-binding protein [EC:7.6.2.11] |
| K11,742    | mdtI;spermidine export protein MdtI                                           |
| K11,743    | mdtJ;spermidine export protein MdtJ                                           |
| K13,747    | nspC;carboxynorspermidine decarboxylase [EC:4.1.1.96]                         |
