# Supplementary material for: Effects of Spermidine on Gut Microbiota Modulation in Experimental Abdominal Aortic Aneurysm Mice
Source: MDPI journal article supplement (doi:10.3390/nu14163349), 2022-08-16
Supplement: s1 [file s1]

Table S2. The Pearson's correlation coefficients at each taxonomic level between AAA diameters and the gut microbiome

|        | #OTU ID            | Pearson <i>r</i> | <i>P</i> value |
|--------|--------------------|------------------|----------------|
| Order  | RF32               | -0.4147          | 0.0491         |
| Family | Paraprevotellaceae | -0.4875          | 0.0183         |
|        | Porphyromonadaceae | 0.4583           | 0.0279         |
| Genus  | Prevotella         | -0.4558          | 0.0288         |
|        | Parabacteroides    | 0.4583           | 0.0279         |
