# Supplementary material for: Effects of Spermidine on Gut Microbiota Modulation in Experimental Abdominal Aortic Aneurysm Mice
Source: Nutrients. 2022 Aug 16;14(16):3349. doi: 10.3390/nu14163349 (PMC9415871; doi:10.3390/nu14163349)
Supplement: Supplementary file 1 [file nutrients-14-03349-s001.zip]

Archive with 4 entries (4 files):
- Supplementary Table S1.pdf
- Supplementary Table S2.pdf
- Supplementary Table S3.pdf
- Supplymental Figures S1-S3pdf.pdf
